# Supplementary material for: Metabolic syndrome and cognitive deficits in the Greek cohort of Epirus Health Study
Source: PubMed Central journal article supplement (PMC10495510; doi:10.1007/s10072-023-06835-4), 2023-05-10
Supplement: 10072_2023_6835_MOESM7_ESM.pdf [file 10072_2023_6835_MOESM7_ESM.pdf]

Metabolic syndrome and cognitive deficits in the Greek cohort of Epirus Health Study, Neurological Sciences, Koutsonida M, Koskeridis F, Markozannes G, Kanellopoulou A, Mousas A, Ntotsikas E, Ioannidis P, Aretouli E and Tsilidis KK; Department of Epidemiology and Biostatistics, School of Public Health, Imperial College London, London, United Kingdom, k.tsilidis@imperial.ac.uk (KKT)

Online Resource 7. Associations between presence of metabolic syndrome (MetS) based on International Diabetes Federation (IDF) criteria and scores of paper-based neuropsychological tests (N=2,077).

| Cognitive functions scores | MetS based on IDF criteria |              |                      |             |
|----------------------------|----------------------------|--------------|----------------------|-------------|
|                            | Model 1 <sup>a</sup>       |              | Model 2 <sup>b</sup> |             |
|                            | Beta                       | 95% CI       | Beta                 | 95% CI      |
| <b>Trail Making Test</b>   |                            |              |                      |             |
| Part A                     | 2.18*                      | 0.85, 3.52   | 2.17*                | 0.82, 3.52  |
| Part B                     | 1.85                       | -0.29, 3.99  | 1.81                 | -0.35, 3.97 |
| <b>Verbal Fluency</b>      |                            |              |                      |             |
| Semantic                   | -0.39                      | -1.08, 0.30  | -0.21                | -0.91, 0.49 |
| Phonemic                   | -0.15                      | -0.57, 0.28  | -0.06                | -0.49, 0.37 |
| <b>Logical Memory</b>      |                            |              |                      |             |
| Immediate recall           | -0.58                      | -1.12, 0.04  | -0.50                | -1.04, 0.04 |
| Delayed recall             | -0.30*                     | -0.58, -0.02 | -0.25                | -0.53, 0.03 |

Abbreviation: CI, confidence interval.

\* significant at p<0.05

<sup>a</sup> Adjusted for age (continuous), sex, education (primary and secondary school, high school, higher education). <sup>b</sup> Adjusted for age (continuous), sex, education (primary and secondary school, high school, higher education), cardiovascular disease (absence or presence of stroke or ischemic heart disease or heart failure or other heart disease diagnosis), alcohol consumption (never, less than once/month, 1-3 times/month, 1-2 times/week, almost every day) and physical activity (continuous)
