# Supplementary material for: Metabolic syndrome and cognitive deficits in the Greek cohort of Epirus Health Study
Source: Springer Nature journal article supplement (doi:10.1007/s10072-023-06835-4), 2023-05-10
Supplement: MOESM1 [file 25340988]

Metabolic syndrome and cognitive deficits in the Greek cohort of Epirus Health Study, Neurological Sciences, Koutsonida M, Koskeridis F, Markozannes G, Kanellopoulou A, Mousas A, Ntotsikas E, Ioannidis P, Aretouli E and Tsilidis KK; Department of Epidemiology and Biostatistics, School of Public Health, Imperial College London, London, United Kingdom, k.tsilidis@imperial.ac.uk (KKT)

Supplementary Table 1. Diagnostic criteria for the definition of metabolic syndrome.

|                        | <b>Revised NCEP-ATP III (2005)</b>                                     | <b>IDF (2005)</b>                                                                          |
|------------------------|------------------------------------------------------------------------|--------------------------------------------------------------------------------------------|
|                        | <b>≥3 of the following</b>                                             | <b>BMI/Central obesity + ≥2 of the following</b>                                           |
| <b>Central obesity</b> | WC ≥ 102 cm (men)<br>WC ≥ 88 cm (women)                                | WC (ethnicity-specific values)<br>For Europeans:<br>WC ≥ 94 cm (men)<br>WC ≥ 80 cm (women) |
| <b>BMI</b>             |                                                                        | > 30 kg/m <sup>2</sup>                                                                     |
| <b>Triglycerides</b>   | ≥150 mg/dL<br>OR Lipid lowering medication                             | ≥ 150 mg/dL<br>OR Lipid lowering medication                                                |
| <b>HDL-C</b>           | < 40 mg/dL (men)<br>< 50 mg/dL (women)<br>OR Lipid lowering medication | < 40 mg/dL (men)<br>< 50 mg/dL (women)<br>OR Lipid lowering medication                     |
| <b>Blood pressure</b>  | SBP ≥ 130 mmHg<br>OR DBP ≥ 85 mmHg<br>OR Antihypertensive medication   | SBP ≥ 130 mmHg<br>OR DBP ≥ 85 mmHg<br>OR Antihypertensive medication                       |
| <b>Fasting glucose</b> | ≥100 mg/dL<br>OR Antidiabetic medication                               | ≥ 100 mg/dL                                                                                |
| <b>Diabetes</b>        |                                                                        | Type 2 Diabetes                                                                            |

Abbreviations: BMI, Body mass index; DBP, diastolic blood pressure; HDL-C, high-density lipoprotein cholesterol; IDF, International Diabetes Federation; NCEP-ATP III, National Cholesterol Education-Adult Treatment Panel III; SBP, systolic blood pressure; WC, waist circumference.
