# Supplementary material for: Metabolic syndrome and cognitive deficits in the Greek cohort of Epirus Health Study
Source: Springer Nature journal article supplement (doi:10.1007/s10072-023-06835-4), 2023-05-10
Supplement: MOESM3 [file 25340988]

Metabolic syndrome and cognitive deficits in the Greek cohort of Epirus Health Study, Neurological Sciences, Koutsonida M, Koskeridis F, Markozannes G, Kanellopoulou A, Mousas A, Ntotsikas E, Ioannidis P, Aretouli E and Tsilidis KK; Department of Epidemiology and Biostatistics, School of Public Health, Imperial College London, London, United Kingdom, k.tsilidis@imperial.ac.uk (KKT)

Online Resource 3. Genotypic information for the single nucleotide polymorphisms (SNPs) included in the calculation of genetic risk score for Metabolic Syndrome.

| Chr | Position  | Gene                   | SNP         | Effect allele | beta     | SE       |
|-----|-----------|------------------------|-------------|---------------|----------|----------|
| 1   | 26695422  | ARID1A                 | rs114165349 | C             | 0.147253 | 0.130037 |
| 1   | 39582337  | PABPC4, HEYL           | rs11206374  | A             | 0.065077 | 0.105334 |
| 1   | 62440818  | USP1                   | rs638714    | T             | 0.051495 | 0.118824 |
| 1   | 93371576  | Y_RNA, DR1             | rs12752223  | T             | 0.037483 | 0.15711  |
| 1   | 177944384 | SEC16B, CRYZL2P-SEC16B | rs10913469  | C             | 0.048264 | 0.143977 |
| 1   | 230161390 | GALNT2                 | rs2281721   | C             | 0.082075 | 0.074616 |
| 2   | 422144    | LINC01865, LINC01874   | rs62107261  | C             | 0.089776 | 0.148048 |
| 2   | 620297    | LINC01875, TMEM18      | rs7563362   | A             | 0.061357 | 0.135369 |
| 2   | 21014672  | APOB                   | rs673548    | A             | 0.09779  | 0.078254 |
| 2   | 27508073  | GCKR                   | rs1260326   | T             | 0.053697 | 0.112925 |
| 2   | 65048915  | LINC02245, LINC02576   | rs1009360   | C             | 0.043589 | 0.127834 |
| 2   | 164675944 | COBLL1                 | rs10187501  | G             | 0.046559 | 0.129399 |
| 2   | 170772553 | Y_RNA, EIF2S2P4        | rs12472667  | G             | 0.03749  | 0.157023 |
| 2   | 226230443 | MIR5702, NYAP2         | rs2138161   | T             | 0.075241 | 0.085682 |
| 3   | 136236137 | PCCB, MSL2             | rs61789601  | T             | 0.068372 | 0.105029 |
| 3   | 157079859 | LINC00880, LEKR1       | rs10049088  | T             | 0.044322 | 0.137229 |
| 4   | 36075982  | ARAP2                  | rs73123462  | T             | 0.149549 | 0.148313 |
| 4   | 87061724  | AFF1                   | rs7660883   | G             | 0.044388 | 0.136469 |
| 4   | 102267552 | SLC39A8                | rs13107325  | T             | 0.07609  | 0.139412 |
| 5   | 75707853  | POC5                   | rs2307111   | C             | 0.036672 | 0.158175 |
| 6   | 31358512  | HLA-B, DHFRP2          | rs9378248   | A             | 0.044068 | 0.140153 |
| 6   | 32610856  | HLA-DRB1, HLA-DQA1     | rs5021727   | G             | 0.037134 | 0.151786 |
| 6   | 34205553  | CYCSP55, KRT18P9       | rs76376137  | G             | 0.082033 | 0.154291 |
| 6   | 34609480  | ILRUN                  | rs11754773  | G             | 0.089294 | 0.111018 |
| 6   | 43790159  | VEGFA, LINC02537       | rs998584    | A             | 0.070685 | 0.088051 |
| 6   | 127118902 | RSPO3                  | rs577721086 | C             | 0.090094 | 0.141976 |
| 6   | 139512875 | ATP5BP6, LINC01625     | rs632057    | T             | 0.048679 | 0.123411 |
| 6   | 160671406 | PLG, LPA               | rs11751347  | T             | 0.062488 | 0.144834 |

|    |           |                       |             |   |          |          |
|----|-----------|-----------------------|-------------|---|----------|----------|
| 6  | 162553872 | PRKN                  | rs10945840  | C | 0.038293 | 0.156109 |
| 7  | 26357619  | SNX10                 | rs1534696   | C | 0.042436 | 0.132312 |
| 7  | 73464315  | BAZ1B                 | rs12056034  | G | 0.096837 | 0.096505 |
| 7  | 130746210 | KLF14, H4P1           | rs10260148  | T | 0.052129 | 0.120377 |
| 7  | 150960007 | KCNH2                 | rs56282717  | A | 0.046096 | 0.142928 |
| 8  | 9325848   | RNU6-526P, RNU6-1151P | rs9987289   | A | 0.087388 | 0.112748 |
| 8  | 18414867  | NAT2, PSD3            | rs4921913   | C | 0.042644 | 0.156915 |
| 8  | 20003850  | LPL                   | rs3844510   | C | 0.191134 | 0.048027 |
| 8  | 20079176  | RPL30P9               | rs28597716  | G | 0.152184 | 0.056484 |
| 8  | 31006422  | PURG                  | rs10954772  | T | 0.039198 | 0.153906 |
| 8  | 115551448 | TRPS1                 | rs3808439   | A | 0.038346 | 0.145502 |
| 8  | 125495066 | LINC00861, TRIB1      | rs2980888   | T | 0.095952 | 0.069709 |
| 9  | 89563557  | SEMA4D, GADD45G       | rs3949781   | T | 0.03802  | 0.149855 |
| 9  | 104884738 | ABCA1                 | rs11789603  | T | 0.058891 | 0.156295 |
| 10 | 21590155  | MLLT10                | rs9971210   | G | 0.03658  | 0.149137 |
| 10 | 63311455  | JMJD1C                | rs10822155  | A | 0.051119 | 0.114662 |
| 10 | 98012647  | CRTAC1                | rs563296    | G | 0.04194  | 0.138314 |
| 11 | 27701787  | BDNF                  | rs56133711  | A | 0.04433  | 0.145853 |
| 11 | 47508395  | CELF1                 | rs7124681   | A | 0.055786 | 0.108461 |
| 11 | 61830500  | FADS2                 | rs1535      | G | 0.079213 | 0.08187  |
| 11 | 65061370  | NAALADL1, CDCA5       | rs35661464  | T | 0.04638  | 0.1398   |
| 11 | 65638129  | SIPA1                 | rs2306363   | T | 0.048276 | 0.14385  |
| 11 | 116778201 | ZPR1                  | rs964184    | G | 0.252628 | 0.033931 |
| 11 | 118494495 | KMT2A                 | rs9332817   | C | 0.115795 | 0.155319 |
| 12 | 49853685  | BCDIN3D, RPL35AP28    | rs7138803   | A | 0.036957 | 0.154213 |
| 12 | 122703928 | HCAR3, HCAR2          | rs56959712  | T | 0.047049 | 0.148955 |
| 15 | 41563538  | TYRO3                 | rs1023193   | T | 0.045397 | 0.13372  |
| 15 | 43735687  | CATSPER2P1            | rs139974673 | C | 0.160596 | 0.111952 |
| 15 | 58386521  | ALDH1A2               | rs261290    | T | 0.077956 | 0.08451  |
| 16 | 15054789  | PDXDC1, NTAN1         | rs11075253  | A | 0.046879 | 0.134341 |
| 16 | 24715743  | TNRC6A                | rs7188873   | A | 0.03863  | 0.15164  |
| 16 | 29983601  | TAOK2                 | rs3814883   | T | 0.039392 | 0.141677 |
| 16 | 53772541  | FTO                   | rs56094641  | G | 0.073677 | 0.084808 |
| 16 | 56956804  | CETP, HERPUD1         | rs247617    | A | 0.196432 | 0.034077 |
| 16 | 81501185  | CMIP                  | rs2925979   | T | 0.06161  | 0.100342 |
| 17 | 7581888   | CD68                  | rs1143015   | A | 0.04914  | 0.158172 |
| 17 | 42561053  | COASY, HSD17B1        | rs12945575  | T | 0.044779 | 0.149288 |

|    |          |                |             |   |          |          |
|----|----------|----------------|-------------|---|----------|----------|
| 17 | 43848758 | CD300LG        | rs72836561  | T | 0.23953  | 0.061094 |
| 17 | 49286745 | FLJ40194       | rs11655056  | C | 0.035993 | 0.157397 |
| 17 | 67844693 | BPTF           | rs11871285  | T | 0.047341 | 0.145796 |
| 18 | 23540071 | NPC1           | rs7239575   | C | 0.043234 | 0.132002 |
| 18 | 49621376 | SMUG1P1, LIPG  | rs1105654   | G | 0.038799 | 0.149413 |
| 18 | 60181418 | MC4R, RNU4-17P | rs66922415  | G | 0.067846 | 0.102856 |
| 19 | 8364439  | ANGPTL4        | rs116843064 | A | 0.337476 | 0.073802 |
| 19 | 44912921 | APOC1, APOE    | rs483082    | T | 0.08993  | 0.079046 |
| 19 | 47068681 | ZC3H4          | rs1532127   | G | 0.04721  | 0.130752 |
| 20 | 44413724 | HNF4A          | rs1800961   | T | 0.138848 | 0.103275 |
| 20 | 64080700 | OPRL1          | rs8121509   | C | 0.036069 | 0.156318 |

---

Abbreviations: Chr, chromosome; SE, standard error.
