# Supplementary material for: Metabolic syndrome and cognitive deficits in the Greek cohort of Epirus Health Study
Source: Springer Nature journal article supplement (doi:10.1007/s10072-023-06835-4), 2023-05-10
Supplement: MOESM4 [file 25340988]

Metabolic syndrome and cognitive deficits in the Greek cohort of Epirus Health Study, Neurological Sciences, Koutsonida M, Koskeridis F, Markozannes G, Kanellopoulou A, Mousas A, Ntotsikas E, Ioannidis P, Aretouli E and Tsilidis KK; Department of Epidemiology and Biostatistics, School of Public Health, Imperial College London, London, United Kingdom, k.tsilidis@imperial.ac.uk (KKT)

Online Resource 4. Genotypic information for the single nucleotide polymorphisms (SNPs) included in the calculation of genetic risk score for Alzheimer's disease.

| Chr | Position  | Gene       | SNP         | Effect allele | beta     | SE       |
|-----|-----------|------------|-------------|---------------|----------|----------|
| 1   | 161155392 | ADAMTS4    | rs4575098   | A             | 0.016412 | 0.002577 |
| 1   | 207786828 | CR1        | rs2093760   | A             | 0.02434  | 0.002742 |
| 2   | 127891427 | BIN1       | rs4663105   | C             | 0.031095 | 0.00222  |
| 2   | 233981912 | INPPD5     | rs10933431  | G             | -0.01544 | 0.002509 |
| 3   | 57226150  | HESX1      | rs184384746 | T             | 0.200409 | 0.035193 |
| 4   | 11026028  | CLNK       | rs6448453   | A             | 0.014705 | 0.002451 |
| 6   | 32583357  | HLA-DRB1   | rs6931277   | T             | -0.01934 | 0.002969 |
| 6   | 40942196  | TREM2      | rs187370608 | A             | 0.233272 | 0.02824  |
| 6   | 47432637  | CD2AP      | rs9381563   | C             | 0.014451 | 0.002272 |
| 7   | 99971834  | ZCWPW1     | rs1859788   | A             | -0.0184  | 0.002313 |
| 7   | 143108158 | EPHA1      | rs7810606   | T             | -0.01452 | 0.002183 |
| 7   | 145950029 | CNTNAP2    | rs114360492 | T             | 0.178834 | 0.029855 |
| 8   | 27464929  | CLU/PTK2B  | rs4236673   | A             | -0.02016 | 0.002229 |
| 10  | 11717397  | ECHDC3     | rs11257238  | C             | 0.012943 | 0.002261 |
| 11  | 59958380  | MS4A6A     | rs2081545   | A             | -0.01787 | 0.00223  |
| 11  | 85776544  | PICALM     | rs867611    | G             | -0.02043 | 0.002324 |
| 11  | 121435587 | SORL1      | rs11218343  | C             | -0.03593 | 0.005255 |
| 14  | 92938855  | SLC24A4    | rs12590654  | A             | -0.01483 | 0.002308 |
| 15  | 59022615  | ADAM10     | rs442495    | C             | -0.01372 | 0.002258 |
| 15  | 63569902  | APH1B      | rs117618017 | T             | 0.018027 | 0.003267 |
| 16  | 31133100  | KAT8       | rs59735493  | A             | -0.01299 | 0.00236  |
| 17  | 5138980   | SCIMP      | rs113260531 | A             | 0.019986 | 0.003251 |
| 17  | 47450775  | ABI3       | rs28394864  | A             | 0.012302 | 0.00218  |
| 18  | 56189459  | ALPK2      | rs76726049  | C             | 0.056797 | 0.010288 |
| 19  | 1039323   | ABCA7      | rs111278892 | G             | 0.019912 | 0.00305  |
| 19  | 45351516  | APOE       | rs41289512  | G             | 0.206303 | 0.005785 |
| 19  | 46241841  | AC074212.3 | rs76320948  | T             | 0.034933 | 0.006366 |
| 19  | 51727962  | CD33       | rs3865444   | A             | -0.01376 | 0.002355 |

|    |          |       |           |   |          |          |
|----|----------|-------|-----------|---|----------|----------|
| 20 | 54998544 | CASS4 | rs6014724 | G | -0.02289 | 0.003688 |
|----|----------|-------|-----------|---|----------|----------|

---

Abbreviations: Chr, chromosome; SE, standard error.
