# Supplementary material for: Metabolic syndrome and cognitive deficits in the Greek cohort of Epirus Health Study
Source: Springer Nature journal article supplement (doi:10.1007/s10072-023-06835-4), 2023-05-10
Supplement: MOESM5 [file 25340988]

Metabolic syndrome and cognitive deficits in the Greek cohort of Epirus Health Study, Neurological Sciences, Koutsonida M, Koskeridis F, Markozannes G, Kanellopoulou A, Mousas A, Ntotsikas E, Ioannidis P, Aretouli E and Tsilidis KK; Department of Epidemiology and Biostatistics, School of Public Health, Imperial College London, London, United Kingdom, k.tsilidis@imperial.ac.uk (KKT)

Online Resource 5. Cognitive scores and follow-up period of study participants overall and by presence of metabolic syndrome (MetS).

| Cognitive function scores           | All participants<br>(n=2,077)       | MetS based on NCEP-ATP III criteria |                            | p value              |
|-------------------------------------|-------------------------------------|-------------------------------------|----------------------------|----------------------|
|                                     |                                     | MetS<br>(n=359)                     | No MetS<br>(n=1,718)       |                      |
| <b>Paper-based tests</b>            |                                     |                                     |                            |                      |
| <i>Trail Making Test</i>            |                                     |                                     |                            |                      |
| Part A                              | 35.34 ± 12.58                       | 39.93 ± 11.42                       | 34.36 ± 11.42              | 3.06e <sup>-14</sup> |
| Part B                              | 65.79 ± 19.94                       | 71.62 ± 22.48                       | 64.57 ± 19.15              | 1.60e <sup>-9</sup>  |
| <i>Verbal Fluency</i>               |                                     |                                     |                            |                      |
| Semantic                            | 21.92 ± 6.00                        | 20.86 ± 6.46                        | 22.13 ± 5.89               | 5.00e <sup>-4</sup>  |
| Phonemic                            | 10.04 ± 3.74                        | 9.22 ± 3.68                         | 10.21 ± 3.73               | 1.50e <sup>-5</sup>  |
| <i>Logical Memory</i>               |                                     |                                     |                            |                      |
| Immediate recall                    | 23.18 ± 4.89                        | 21.62 ± 4.96                        | 23.51 ± 4.82               | 2.41e <sup>-11</sup> |
| Delayed recall                      | 13.40 ± 2.55                        | 12.59 ± 2.69                        | 13.57 ± 2.49               | 2.35e <sup>-11</sup> |
|                                     | <b>All participants<br/>(n=156)</b> | <b>MetS<br/>(n=25)</b>              | <b>No MetS<br/>(n=131)</b> | <b>p value</b>       |
| <b>Follow-up period, days</b>       | 289.25 ± 274.60                     | 334.82 ± 257.10                     | 282.59 ± 276.90            | 0.27                 |
| <b>Computer-based tests</b>         |                                     |                                     |                            |                      |
| <i>Posner cueing</i>                |                                     |                                     |                            |                      |
| Total correct                       | 43.73 ± 11.34                       | 41.96 ± 11.63                       | 44.07 ± 11.30              | 0.40                 |
| Mean reaction time - valid trials   | 0.49 ± 0.12                         | 0.49 ± 0.13                         | 0.49 ± 0.12                | 0.95                 |
| Mean reaction time - invalid trials | 0.62 ± 0.14                         | 0.63 ± 0.11                         | 0.62 ± 0.14                | 0.56                 |
| <i>Emotional word recognition</i>   |                                     |                                     |                            |                      |
| Total correct                       | 58.17 ± 6.63                        | 55.44 ± 6.04                        | 58.70 ± 6.63               | 0.02                 |
| True positive                       | 30.71 ± 3.82                        | 30.20 ± 3.82                        | 30.81 ± 3.52               | 0.43                 |
| True negative                       | 27.46 ± 4.33                        | 25.24 ± 4.02                        | 27.89 ± 4.27               | 4.70e <sup>-3</sup>  |
| <i>Corsi block-tapping</i>          |                                     |                                     |                            |                      |
| Forward                             | 5.08 ± 1.92                         | 4.80 ± 2.22                         | 5.13 ± 1.86                | 0.43                 |
| Backward                            | 5.03 ± 1.95                         | 5.04 ± 1.49                         | 5.02 ± 2.03                | 0.97                 |

---

*Stroop*

|                                         |               |               |               |                     |
|-----------------------------------------|---------------|---------------|---------------|---------------------|
| Total correct                           | 35.73 ± 13.98 | 26.52 ± 13.73 | 37.46 ± 13.40 | 5.00e <sup>-4</sup> |
| Mean reaction time - congruent trials   | 1.02 ± 0.21   | 1.04 ± 0.18   | 1.02 ± 0.22   | 0.68                |
| Mean reaction time - incongruent trials | 1.12 ± 0.25   | 1.17 ± 0.22   | 1.10 ± 0.25   | 0.24                |

---

Mean ± standard deviation are presented.
