# Supplementary material for: Metabolic syndrome and cognitive deficits in the Greek cohort of Epirus Health Study
Source: Springer Nature journal article supplement (doi:10.1007/s10072-023-06835-4), 2023-05-10
Supplement: MOESM6 [file 25340988]

Metabolic syndrome and cognitive deficits in the Greek cohort of Epirus Health Study, Neurological Sciences, Koutsonida M, Koskeridis F, Markozannes G, Kanellopoulou A, Mousas A, Ntotsikas E, Ioannidis P, Aretouli E and Tsilidis KK; Department of Epidemiology and Biostatistics, School of Public Health, Imperial College London, London, United Kingdom, k.tsilidis@imperial.ac.uk (KKT)

Online Resource 6. Interaction analysis of metabolic syndrome (MetS) based on National Cholesterol Education-Adult Treatment Panel III (NCEP-ATP III) criteria and paper-based neuropsychological tests by (A) sex, (B) age, (C) Genetic Risk Score for MetS and (D) Genetic Risk Score for Alzheimer’s Disease.

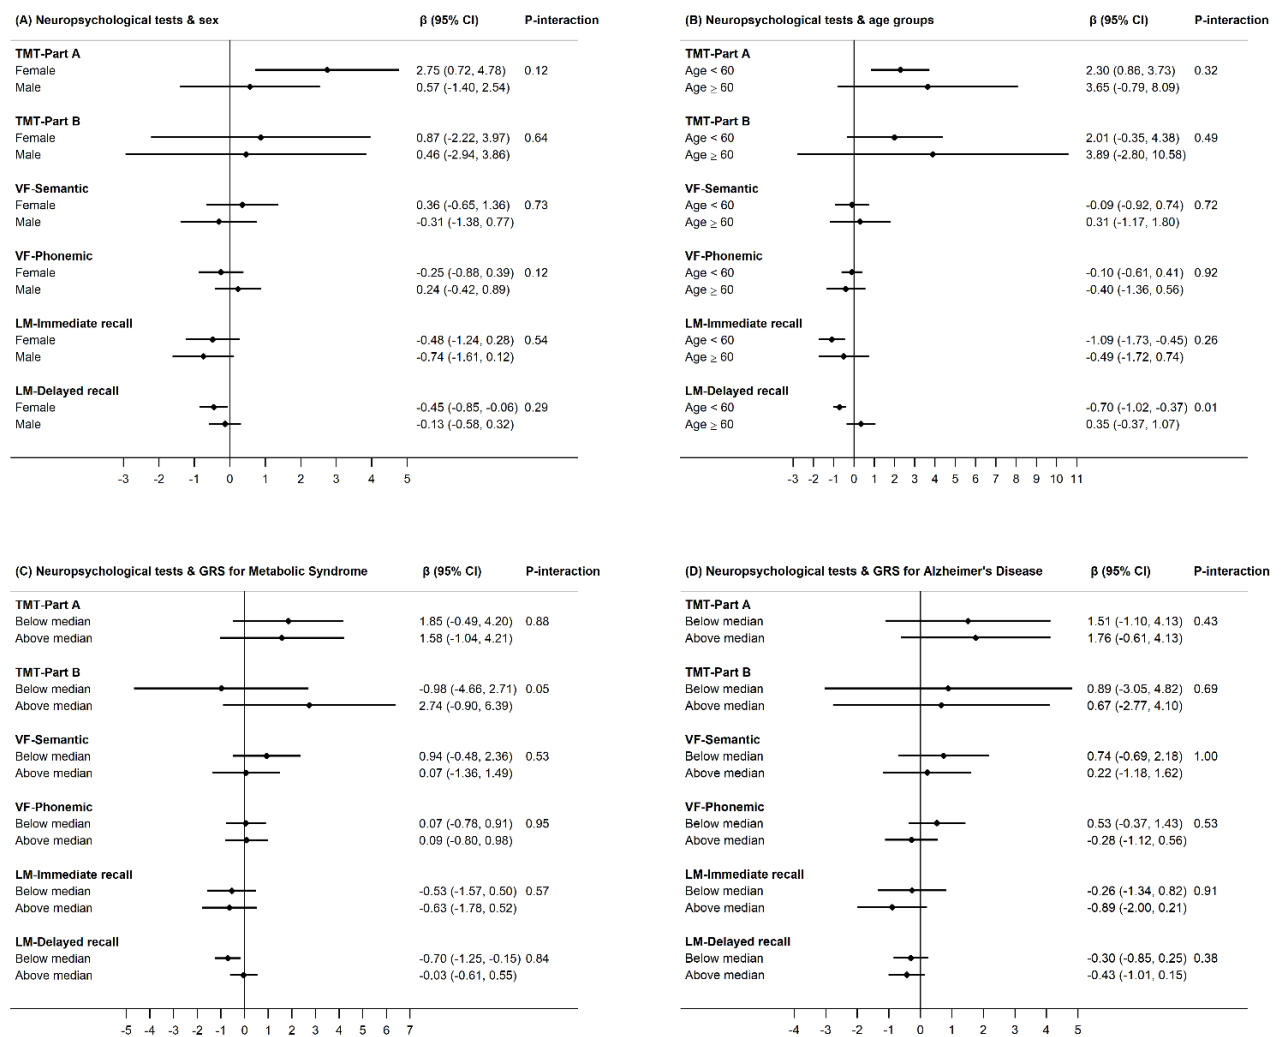

Abbreviations: GRS, Genetic Risk Score; LM, Logical memory; TMT, Trail Making Test; VF, Verbal fluency.

Footnote: The analyses were run using the continuous GRS for MetS and for Alzheimer’s Disease but they were dichotomized at the median for illustrative reasons.
